# Supplementary material for: Network-wide abnormalities explain memory variability in hippocampal amnesia
Source: eLife. 2019 Jul 8;8:e46156. doi: 10.7554/eLife.46156 (PMC6639076; doi:10.7554/eLife.46156)
Supplement: Figure 2—figure supplement 1—source data 1. — These data can be opened with Microsoft Excel or with open-source alternatives such as OpenOffice. [file elife-46156-fig2-figsupp1-data1.xlsx]

## Sheet: elife_paper_data_28_06_19_new
patient_code	control_code	sMRI_controls_vs_patients	rsfMRI_controls_vs_patients	VBM_HPC_clusters_average_GM_volume_zres	VBM_Thalamic_clusters_average_GM_volume_zres	rsALFF_PCC_zres
NaN	30	1	0	0.664506	0.46126	NaN
NaN	2	1	0	0.0173365	-0.289624	NaN
NaN	22	1	0	-0.310711	0.340459	NaN
NaN	10	1	0	-0.215566	0.36375	NaN
NaN	16	1	0	0.17487	1.08084	NaN
NaN	29	1	0	0.0345239	0.265572	NaN
NaN	24	1	0	-0.223485	0.0983095	NaN
NaN	28	1	0	0.267724	1.12942	NaN
NaN	11	1	0	-0.64493	-0.907155	NaN
NaN	7	1	0	-0.181497	-0.11585	NaN
NaN	15	1	0	0.421696	0.766095	NaN
NaN	3	1	0	-0.591347	-0.790968	NaN
NaN	14	1	0	-0.0152418	0.516768	NaN
NaN	31	1	0	0.0994488	0.189815	NaN
NaN	4	1	0	-0.0203664	-0.0880696	NaN
NaN	26	1	0	0.222928	1.24378	NaN
NaN	5	1	0	0.270106	-1.26892	NaN
NaN	19	1	0	0.115192	-0.40369	NaN
NaN	18	1	0	-0.0982265	0.460468	NaN
NaN	25	1	0	-0.322174	1.31389	NaN
NaN	6	1	0	-0.609687	-1.75809	NaN
NaN	9	1	0	0.323427	0.354709	NaN
NaN	23	1	0	-0.22232	0.278529	NaN
NaN	1	1	0	0.754062	-0.0517461	NaN
NaN	8	1	0	0.242146	0.174714	NaN
NaN	17	1	0	-0.342426	-1.18685	NaN
NaN	52	1	0	0.746836	0.690185	NaN
NaN	20	1	0	-0.46694	-0.514162	NaN
NaN	27	1	0	-0.128607	-0.502086	NaN
NaN	33	1	0	0.328385	0.663758	NaN
NaN	21	1	0	0.173166	-0.225232	NaN
NaN	13	1	0	0.571077	0.468535	NaN
NaN	32	1	0	0.111178	-0.430268	NaN
NaN	37	1	0	0.984487	0.367837	NaN
NaN	12	1	0	-0.0698619	-0.974188	NaN
NaN	39	1	1	0.510637	0.777907	1.70415
NaN	67	1	1	0.247286	-0.888086	2.26266
NaN	73	1	1	-0.00248156	0.5572	1.27471
NaN	66	1	1	0.551928	1.34369	0.819618
NaN	45	1	1	1.88682	0.18991	0.543115
NaN	35	1	1	1.29911	0.56041	1.3746
NaN	55	1	1	1.22252	0.906024	1.051
NaN	43	1	1	1.27052	1.1045	1.36065
NaN	64	1	1	0.630933	-0.266553	0.438084
NaN	41	1	1	1.98808	1.14261	0.597149
NaN	71	1	1	0.646232	0.597919	-0.605248
NaN	56	1	1	0.169965	0.175175	-0.151164
NaN	42	1	1	1.19192	0.898957	1.55785
NaN	50	1	1	0.498128	0.336161	-1.50694
NaN	51	1	1	0.791116	0.745737	1.46283
NaN	72	1	1	0.621934	1.07739	0.854537
NaN	63	1	1	0.0401447	1.46835	1.45955
NaN	75	1	1	0.981184	1.65662	0.637691
NaN	54	1	1	0.130538	-1.03853	-0.427026
NaN	60	1	1	1.36166	0.669909	-0.072136
NaN	47	1	1	1.69547	0.867844	-0.172248
NaN	65	1	1	0.144449	2.44421	-0.536164
NaN	78	1	1	0.70429	-1.18797	0.593394
NaN	34	1	1	0.824994	1.58039	-0.446586
NaN	49	1	1	0.854765	0.939594	-0.725185
NaN	38	1	1	-0.112551	0.85582	0.142603
NaN	36	1	1	-0.428326	0.606064	0.234327
NaN	57	1	1	0.359068	-0.0066427	-0.496012
NaN	46	1	1	0.180604	0.356317	0.485118
NaN	74	1	1	1.2917	0.559748	1.52716
NaN	62	1	1	-0.585079	0.266878	-0.520128
NaN	70	1	1	0.580816	0.31471	1.06068
1	NaN	2	0	-0.558382	0.608886	NaN
34	NaN	2	0	-2.76571	-0.902082	NaN
32	NaN	2	0	-1.82258	-0.622432	NaN
21	NaN	2	2	-0.124298	0.589702	-1.04591
20	NaN	2	2	-0.220798	-1.19766	-0.803919
19	NaN	2	2	1.29065	0.7465	1.4758
33	NaN	2	2	-1.08412	-2.74213	-1.84378
14	NaN	2	2	-1.17263	-0.95917	-1.18208
2	NaN	2	2	-0.191784	-0.216579	0.696771
6	NaN	2	2	0.255832	-0.481794	-0.285356
8	NaN	2	2	0.452697	-0.350953	-0.839502
24	NaN	2	2	-1.64928	-0.089972	-0.572624
18	NaN	2	2	0.76661	-0.122037	0.609298
4	NaN	2	2	-1.55851	-2.13445	-0.757332
29	NaN	2	2	-0.873192	-0.514675	0.0125872
11	NaN	2	2	-0.373314	-1.10821	-0.468851
28	NaN	2	2	-0.992733	-1.6402	-1.21082
17	NaN	2	2	-1.18469	-0.567001	-0.475104
12	NaN	2	2	0.0248561	0.696161	1.11713
15	NaN	2	2	-0.143102	-0.993163	-0.786622
7	NaN	2	2	1.50475	0.0129445	1.01164
37	NaN	2	2	-1.1632	-1.46687	-0.917496
38	NaN	2	2	0.653506	-0.246877	-0.660043
3	NaN	2	2	0.714079	-0.268559	0.262077
23	NaN	2	2	0.757086	0.881336	1.00899
5	NaN	2	2	-0.526807	-0.653311	-0.335832
31	NaN	2	2	-3.0481	-0.751409	-1.00407
25	NaN	2	2	-1.05176	-0.940029	-2.21376
9	NaN	2	2	-0.724649	0.351942	-0.252576
16	NaN	2	2	-0.301004	-0.582088	-1.41344
10	NaN	2	2	-2.18192	-1.64998	0.156096
13	NaN	2	2	-1.78959	-1.31041	-0.379481
22	NaN	2	2	0.296006	-0.12159	-0.40394
26	NaN	2	2	-2.6444	-1.45337	-0.892423
35	NaN	2	2	-1.19703	0.601523	-1.4971
27	NaN	2	2	-0.0269354	0.121727	-0.328057
30	NaN	2	2	-0.543482	-1.45538	-1.24139
36	NaN	2	2	-0.410151	-0.4024	-0.321519
