# Supplementary material for: Network-wide abnormalities explain memory variability in hippocampal amnesia
Source: eLife. 2019 Jul 8;8:e46156. doi: 10.7554/eLife.46156 (PMC6639076; doi:10.7554/eLife.46156)
Supplement: Figure 3—source data 1. [file elife-46156-fig3-data1.xlsx]

## Sheet: elife_paper_data_28_06_19_new
patient_code	control_code	neuropsych_controls_vs_patients	sMRI_controls_vs_patients	rsfMRI_controls_vs_patients	VBM_Left_HPC_zres	rsFC_Right_to_Left_HPC_zres	verbal_recognition_memory_z
NaN	30	0	1	0	0.589151	NaN	NaN
NaN	2	0	1	0	0.193507	NaN	NaN
NaN	22	0	1	0	-0.582013	NaN	NaN
NaN	10	0	1	0	-0.272724	NaN	NaN
NaN	16	0	1	0	0.0746407	NaN	NaN
NaN	29	0	1	0	0.109593	NaN	NaN
NaN	24	0	1	0	-0.291398	NaN	NaN
NaN	28	0	1	0	0.106718	NaN	NaN
NaN	11	0	1	0	-0.804656	NaN	NaN
NaN	7	0	1	0	-0.139765	NaN	NaN
NaN	15	0	1	0	0.417335	NaN	NaN
NaN	3	0	1	0	-0.564556	NaN	NaN
NaN	14	0	1	0	0.0833658	NaN	NaN
NaN	31	0	1	0	-0.0371181	NaN	NaN
NaN	4	0	1	0	0.202272	NaN	NaN
NaN	26	0	1	0	-0.232714	NaN	NaN
NaN	5	0	1	0	0.581953	NaN	NaN
NaN	19	0	1	0	0.0214326	NaN	NaN
NaN	18	0	1	0	-0.478001	NaN	NaN
NaN	25	0	1	0	-0.761643	NaN	NaN
NaN	6	0	1	0	-0.558748	NaN	NaN
NaN	9	0	1	0	0.448855	NaN	NaN
NaN	23	0	1	0	-0.150434	NaN	NaN
NaN	1	0	1	0	0.554588	NaN	NaN
NaN	8	0	1	0	0.392132	NaN	NaN
NaN	17	0	1	0	-0.165247	NaN	NaN
NaN	52	1	1	0	0.565234	NaN	-1.22
NaN	20	0	1	0	-0.231213	NaN	NaN
NaN	27	0	1	0	0.0125106	NaN	NaN
NaN	33	0	1	0	0.0721267	NaN	NaN
NaN	21	0	1	0	0.121239	NaN	NaN
NaN	13	0	1	0	0.584252	NaN	NaN
NaN	32	0	1	0	0.518393	NaN	NaN
NaN	37	0	1	0	1.04053	NaN	NaN
NaN	12	0	1	0	0.258293	NaN	NaN
NaN	39	1	1	1	0.403339	-0.0833572	0
NaN	67	1	1	1	0.0992283	0.663892	1.22333
NaN	73	1	1	1	0.0610973	0.461668	-0.78
NaN	66	1	1	1	0.572102	1.53572	1.67
NaN	45	1	1	1	1.87671	1.14537	0.666667
NaN	35	0	1	1	1.4023	0.0706596	NaN
NaN	55	1	1	1	0.907488	0.837498	1.66667
NaN	43	1	1	1	1.6142	-0.931292	0.776667
NaN	64	1	1	1	0.3737	0.491377	1
NaN	41	1	1	1	1.97381	1.61531	0.776667
NaN	71	1	1	1	0.542676	-0.433309	0.886667
NaN	56	1	1	1	0.543587	-0.522016	0.556667
NaN	42	1	1	1	1.36176	0.123942	0.996667
NaN	50	1	1	1	0.345402	0.625384	-0.443333
NaN	51	1	1	1	0.895819	0.527398	0.553333
NaN	72	1	1	1	0.518712	0.619377	0.556667
NaN	63	1	1	1	0.0340454	1.60293	0.446667
NaN	75	1	1	1	1.13502	0.180595	-0.00333333
NaN	54	1	1	1	-0.140408	0.494154	1.55667
NaN	60	1	1	1	1.13056	0.110996	1.22333
NaN	47	1	1	1	1.47207	0.75014	-0.22
NaN	65	1	1	1	0.224959	0.695408	0.556667
NaN	78	1	1	1	0.741195	-0.0483966	0.666667
NaN	34	0	1	1	1.00177	-0.0994001	NaN
NaN	49	1	1	1	0.763408	1.37521	1.78
NaN	38	0	1	1	-0.335143	0.454832	NaN
NaN	36	0	1	1	-0.423668	1.06124	NaN
NaN	57	1	1	1	0.137305	0.0502541	0.333333
NaN	46	1	1	1	0.486359	0.952219	1.55667
NaN	74	1	1	1	1.03747	0.711042	0.666667
NaN	62	1	1	1	-0.645283	0.877048	1.44667
NaN	70	1	1	1	0.545014	0.500974	1.11
1	NaN	2	2	0	-0.711501	NaN	-0.00333333
34	NaN	2	2	0	-2.93237	NaN	-1.165
32	NaN	2	2	0	-1.80245	NaN	-1.44333
21	NaN	2	2	2	-0.853442	0.561588	-0.89
20	NaN	2	2	2	-0.360821	-0.654923	-1.44667
19	NaN	2	2	2	1.44519	1.49299	0.443333
33	NaN	2	2	2	0.281831	-0.398915	-1.00333
14	NaN	2	2	2	-0.777999	-1.95016	-1.99667
2	NaN	2	2	2	-0.152816	-0.854627	-0.556667
6	NaN	2	2	2	0.406071	-0.272073	0
8	NaN	2	2	2	0.757818	-0.00620861	0.11
24	NaN	2	2	2	-1.56004	-0.518443	0.553333
18	NaN	2	2	2	0.734292	0.665985	0.333333
4	NaN	2	2	2	-1.52937	-0.0711922	0.335
29	NaN	2	2	2	-0.779694	-0.55565	-0.223333
11	NaN	2	2	2	0.120517	1.14716	-0.223333
28	NaN	2	2	2	-0.608239	-1.54061	-2
17	NaN	2	2	2	-1.43458	-0.0847239	1
12	NaN	2	2	2	0.917947	-0.604246	0.113333
15	NaN	2	2	2	0.490711	-0.398065	4e-17
7	NaN	2	2	2	1.13464	-2.95873	-2.17
37	NaN	2	2	2	-1.30015	0.0229332	-2.33333
38	NaN	2	2	2	0.981278	-0.84411	-0.89
3	NaN	2	2	2	0.152106	-1.01921	-0.556667
23	NaN	2	2	2	0.800927	1.3352	-0.11
5	NaN	2	2	2	-0.955919	-0.930727	0.11
31	NaN	2	2	2	-3.475	0.618186	-2.33333
25	NaN	2	2	2	-0.930879	-1.77682	-0.663333
9	NaN	2	2	2	-1.21532	0.160266	0.335
16	NaN	2	2	2	-1.17946	-1.88111	-1.44667
10	NaN	2	2	2	-2.35685	-1.47924	-0.776667
13	NaN	2	2	2	-1.63364	-0.643415	-1.66667
22	NaN	2	2	2	0.645961	0.453784	0.556667
26	NaN	2	2	2	-3.02568	-0.833454	-2.11333
35	NaN	2	2	2	-1.27234	-0.186415	-0.886667
27	NaN	2	2	2	0.170286	1.0872	-0.556667
30	NaN	2	2	2	-0.376	-1.91317	-2.5
36	NaN	2	2	2	-0.149483	-1.58592	NaN
