# Supplementary material for: Network-wide abnormalities explain memory variability in hippocampal amnesia
Source: eLife. 2019 Jul 8;8:e46156. doi: 10.7554/eLife.46156 (PMC6639076; doi:10.7554/eLife.46156)
Supplement: Figure 4—source data 1. [file elife-46156-fig4-data1.xlsx]

## Sheet: elife_paper_data_28_06_19_new
patient_code	control_code	neuropsych_controls_vs_patients	sMRI_controls_vs_patients	rsfMRI_controls_vs_patients	VBM_Left_HPC_zres	rsALFF_PCC_zres	visual_recognition_memory_z
NaN	30	0	1	0	0.589151	NaN	NaN
NaN	2	0	1	0	0.193507	NaN	NaN
NaN	22	0	1	0	-0.582013	NaN	NaN
NaN	10	0	1	0	-0.272724	NaN	NaN
NaN	16	0	1	0	0.0746407	NaN	NaN
NaN	29	0	1	0	0.109593	NaN	NaN
NaN	24	0	1	0	-0.291398	NaN	NaN
NaN	28	0	1	0	0.106718	NaN	NaN
NaN	11	0	1	0	-0.804656	NaN	NaN
NaN	7	0	1	0	-0.139765	NaN	NaN
NaN	15	0	1	0	0.417335	NaN	NaN
NaN	3	0	1	0	-0.564556	NaN	NaN
NaN	14	0	1	0	0.0833658	NaN	NaN
NaN	31	0	1	0	-0.0371181	NaN	NaN
NaN	4	0	1	0	0.202272	NaN	NaN
NaN	26	0	1	0	-0.232714	NaN	NaN
NaN	5	0	1	0	0.581953	NaN	NaN
NaN	19	0	1	0	0.0214326	NaN	NaN
NaN	18	0	1	0	-0.478001	NaN	NaN
NaN	25	0	1	0	-0.761643	NaN	NaN
NaN	6	0	1	0	-0.558748	NaN	NaN
NaN	9	0	1	0	0.448855	NaN	NaN
NaN	23	0	1	0	-0.150434	NaN	NaN
NaN	1	0	1	0	0.554588	NaN	NaN
NaN	8	0	1	0	0.392132	NaN	NaN
NaN	17	0	1	0	-0.165247	NaN	NaN
NaN	52	1	1	0	0.565234	NaN	-0.0377027
NaN	20	0	1	0	-0.231213	NaN	NaN
NaN	27	0	1	0	0.0125106	NaN	NaN
NaN	33	0	1	0	0.0721267	NaN	NaN
NaN	21	0	1	0	0.121239	NaN	NaN
NaN	13	0	1	0	0.584252	NaN	NaN
NaN	32	0	1	0	0.518393	NaN	NaN
NaN	37	0	1	0	1.04053	NaN	NaN
NaN	12	0	1	0	0.258293	NaN	NaN
NaN	39	1	1	1	0.403339	1.70415	-0.742576
NaN	67	1	1	1	0.0992283	2.26266	-0.0114164
NaN	73	1	1	1	0.0610973	1.27471	-0.11803
NaN	66	1	1	1	0.572102	0.819618	1.56757
NaN	45	1	1	1	1.87671	0.543115	0.767432
NaN	35	0	1	1	1.4023	1.3746	NaN
NaN	55	1	1	1	0.907488	1.051	0.632297
NaN	43	1	1	1	1.6142	1.36065	1.4359
NaN	64	1	1	1	0.3737	0.438084	-0.137973
NaN	41	1	1	1	1.97381	0.597149	0.537703
NaN	71	1	1	1	0.542676	-0.605248	0.38197
NaN	56	1	1	1	0.543587	-0.151164	1.67
NaN	42	1	1	1	1.36176	1.55785	1.93243
NaN	50	1	1	1	0.345402	-1.50694	2.30769
NaN	51	1	1	1	0.895819	1.46283	1.0377
NaN	72	1	1	1	0.518712	0.854537	1.3991
NaN	63	1	1	1	0.0340454	1.45955	0.501515
NaN	75	1	1	1	1.13502	0.637691	0.00283784
NaN	54	1	1	1	-0.140408	-0.427026	0.672838
NaN	60	1	1	1	1.13056	-0.072136	2.00284
NaN	47	1	1	1	1.47207	-0.172248	0.363485
NaN	65	1	1	1	0.224959	-0.536164	-0.591061
NaN	78	1	1	1	0.741195	0.593394	0.462297
NaN	34	0	1	1	1.00177	-0.446586	NaN
NaN	49	1	1	1	0.763408	-0.725185	0.31803
NaN	38	0	1	1	-0.335143	0.142603	NaN
NaN	36	0	1	1	-0.423668	0.234327	NaN
NaN	57	1	1	1	0.137305	-0.496012	0.488584
NaN	46	1	1	1	0.486359	0.485118	0.81803
NaN	74	1	1	1	1.03747	1.52716	1.15303
NaN	62	1	1	1	-0.645283	-0.520128	1.00152
NaN	70	1	1	1	0.545014	1.06068	1.00152
1	NaN	2	2	0	-0.711501	NaN	0.386282
34	NaN	2	2	0	-2.93237	NaN	-1.83784
32	NaN	2	2	0	-1.80245	NaN	-0.713378
21	NaN	2	2	2	-0.853442	-1.04591	-0.937564
20	NaN	2	2	2	-0.360821	-0.803919	-1.33
19	NaN	2	2	2	1.44519	1.4758	0.344487
33	NaN	2	2	2	0.281831	-1.84378	-2.21905
14	NaN	2	2	2	-0.777999	-1.18208	-1.23077
2	NaN	2	2	2	-0.152816	0.696771	0.807692
6	NaN	2	2	2	0.406071	-0.285356	0.797297
8	NaN	2	2	2	0.757818	-0.839502	-0.540128
24	NaN	2	2	2	-1.56004	-0.572624	-0.537703
18	NaN	2	2	2	0.734292	0.609298	0.642692
4	NaN	2	2	2	-1.52937	-0.757332	-2.02727
29	NaN	2	2	2	-0.779694	0.0125872	-1.25392
11	NaN	2	2	2	0.120517	-0.468851	1.36348
28	NaN	2	2	2	-0.608239	-1.21082	-1.33
17	NaN	2	2	2	-1.43458	-0.475104	-0.0782432
12	NaN	2	2	2	0.917947	1.11713	1.00152
15	NaN	2	2	2	0.490711	-0.786622	2.00284
7	NaN	2	2	2	1.13464	1.01164	-0.448784
37	NaN	2	2	2	-1.30015	-0.917496	-2.24359
38	NaN	2	2	2	0.981278	-0.660043	-0.0233618
3	NaN	2	2	2	0.152106	0.262077	-0.0377027
23	NaN	2	2	2	0.800927	1.00899	-0.608108
5	NaN	2	2	2	-0.955919	-0.335832	0.597432
31	NaN	2	2	2	-3.475	-1.00407	-2.335
25	NaN	2	2	2	-0.930879	-2.21376	-1.75392
9	NaN	2	2	2	-1.21532	-0.252576	NaN
16	NaN	2	2	2	-1.17946	-1.41344	-1.28378
10	NaN	2	2	2	-2.35685	0.156096	0.732568
13	NaN	2	2	2	-1.63364	-0.379481	0.824232
22	NaN	2	2	2	0.645961	-0.40394	0.67
26	NaN	2	2	2	-3.02568	-0.892423	-2.12446
35	NaN	2	2	2	-1.27234	-1.4971	-0.45303
27	NaN	2	2	2	0.170286	-0.328057	-0.67
30	NaN	2	2	2	-0.376	-1.24139	-3
36	NaN	2	2	2	-0.149483	-0.321519	NaN
