# Supplementary material for: Network-wide abnormalities explain memory variability in hippocampal amnesia
Source: eLife. 2019 Jul 8;8:e46156. doi: 10.7554/eLife.46156 (PMC6639076; doi:10.7554/eLife.46156)
Supplement: Figure 6—source data 1. — GM volume of the left HPC VBM cluster and the mean rsALFF in the PCC (z-res) and the visual recall memory composite scores (z) of healthy controls and patients that are plotted in Figure 6; GM: gray matter; HPC: hippocampus; MAP: Memory and Amnesia Project; OPTIMA: Oxford Project To Investigate Memory and Aging; PCC: posterior cingulate cortex; rsALFF: resting-state amplitude of low-frequency fluctuations; VBM: voxel-based morphometry; z: memory scores are averaged age-scaled and standardized scores of participants’ performance in the subtests of interest; z-res: GM volumes from VBM clusters are residualized against age, sex, scan source (MAP, OPTIMA), and TIV across participants; mean rsALFF is residualized against age and sex across participants. These data can be opened with Microsoft Excel or with open-source alternatives such as OpenOffice. [file elife-46156-fig6-data1.xlsx]

## Sheet: elife_paper_data_28_06_19_new
patient_code	control_code	neuropsych_controls_vs_patients	sMRI_controls_vs_patients	rsfMRI_controls_vs_patients	VBM_Left_HPC_zres	rsALFF_PCC_zres	visual_recall_memory_z
NaN	30	0	1	0	0.589151	NaN	NaN
NaN	2	0	1	0	0.193507	NaN	NaN
NaN	22	0	1	0	-0.582013	NaN	NaN
NaN	10	0	1	0	-0.272724	NaN	NaN
NaN	16	0	1	0	0.0746407	NaN	NaN
NaN	29	0	1	0	0.109593	NaN	NaN
NaN	24	0	1	0	-0.291398	NaN	NaN
NaN	28	0	1	0	0.106718	NaN	NaN
NaN	11	0	1	0	-0.804656	NaN	NaN
NaN	7	0	1	0	-0.139765	NaN	NaN
NaN	15	0	1	0	0.417335	NaN	NaN
NaN	3	0	1	0	-0.564556	NaN	NaN
NaN	14	0	1	0	0.0833658	NaN	NaN
NaN	31	0	1	0	-0.0371181	NaN	NaN
NaN	4	0	1	0	0.202272	NaN	NaN
NaN	26	0	1	0	-0.232714	NaN	NaN
NaN	5	0	1	0	0.581953	NaN	NaN
NaN	19	0	1	0	0.0214326	NaN	NaN
NaN	18	0	1	0	-0.478001	NaN	NaN
NaN	25	0	1	0	-0.761643	NaN	NaN
NaN	6	0	1	0	-0.558748	NaN	NaN
NaN	9	0	1	0	0.448855	NaN	NaN
NaN	23	0	1	0	-0.150434	NaN	NaN
NaN	1	0	1	0	0.554588	NaN	NaN
NaN	8	0	1	0	0.392132	NaN	NaN
NaN	17	0	1	0	-0.165247	NaN	NaN
NaN	52	1	1	0	0.565234	NaN	0.0466667
NaN	20	0	1	0	-0.231213	NaN	NaN
NaN	27	0	1	0	0.0125106	NaN	NaN
NaN	33	0	1	0	0.0721267	NaN	NaN
NaN	21	0	1	0	0.121239	NaN	NaN
NaN	13	0	1	0	0.584252	NaN	NaN
NaN	32	0	1	0	0.518393	NaN	NaN
NaN	37	0	1	0	1.04053	NaN	NaN
NaN	12	0	1	0	0.258293	NaN	NaN
NaN	39	1	1	1	0.403339	1.70415	1.11
NaN	67	1	1	1	0.0992283	2.26266	0.706667
NaN	73	1	1	1	0.0610973	1.27471	1.12333
NaN	66	1	1	1	0.572102	0.819618	0.62
NaN	45	1	1	1	1.87671	0.543115	-0.18
NaN	35	0	1	1	1.4023	1.3746	NaN
NaN	55	1	1	1	0.907488	1.051	0.84
NaN	43	1	1	1	1.6142	1.36065	2.04333
NaN	64	1	1	1	0.3737	0.438084	-0.0466667
NaN	41	1	1	1	1.97381	0.597149	0.95
NaN	71	1	1	1	0.542676	-0.605248	0.843333
NaN	56	1	1	1	0.543587	-0.151164	0.58
NaN	42	1	1	1	1.36176	1.55785	1.78
NaN	50	1	1	1	0.345402	-1.50694	1.55667
NaN	51	1	1	1	0.895819	1.46283	2.11333
NaN	72	1	1	1	0.518712	0.854537	1.22333
NaN	63	1	1	1	0.0340454	1.45955	1.11
NaN	75	1	1	1	1.13502	0.637691	1.11333
NaN	54	1	1	1	-0.140408	-0.427026	1.92
NaN	60	1	1	1	1.13056	-0.072136	1.55667
NaN	47	1	1	1	1.47207	-0.172248	0.35
NaN	65	1	1	1	0.224959	-0.536164	0.46
NaN	78	1	1	1	0.741195	0.593394	1.89
NaN	34	0	1	1	1.00177	-0.446586	NaN
NaN	49	1	1	1	0.763408	-0.725185	1.21667
NaN	38	0	1	1	-0.335143	0.142603	NaN
NaN	36	0	1	1	-0.423668	0.234327	NaN
NaN	57	1	1	1	0.137305	-0.496012	-0.546667
NaN	46	1	1	1	0.486359	0.485118	1.57667
NaN	74	1	1	1	1.03747	1.52716	0.466667
NaN	62	1	1	1	-0.645283	-0.520128	1.89
NaN	70	1	1	1	0.545014	1.06068	0.963333
1	NaN	2	2	0	-0.711501	NaN	1.44667
34	NaN	2	2	0	-2.93237	NaN	NaN
32	NaN	2	2	0	-1.80245	NaN	-1.94667
21	NaN	2	2	2	-0.853442	-1.04591	-1.16333
20	NaN	2	2	2	-0.360821	-0.803919	-2.89
19	NaN	2	2	2	1.44519	1.4758	1.1
33	NaN	2	2	2	0.281831	-1.84378	-0.903333
14	NaN	2	2	2	-0.777999	-1.18208	-2.05333
2	NaN	2	2	2	-0.152816	0.696771	0.896667
6	NaN	2	2	2	0.406071	-0.285356	-1.48
8	NaN	2	2	2	0.757818	-0.839502	1.22667
24	NaN	2	2	2	-1.56004	-0.572624	0.436667
18	NaN	2	2	2	0.734292	0.609298	0.886667
4	NaN	2	2	2	-1.52937	-0.757332	-1.5
29	NaN	2	2	2	-0.779694	0.0125872	-1.61333
11	NaN	2	2	2	0.120517	-0.468851	0.89
28	NaN	2	2	2	-0.608239	-1.21082	-0.526667
17	NaN	2	2	2	-1.43458	-0.475104	0.303333
12	NaN	2	2	2	0.917947	1.11713	-0.31
15	NaN	2	2	2	0.490711	-0.786622	0.576667
7	NaN	2	2	2	1.13464	1.01164	-1.66333
37	NaN	2	2	2	-1.30015	-0.917496	-2.03333
38	NaN	2	2	2	0.981278	-0.660043	-1.56667
3	NaN	2	2	2	0.152106	0.262077	0.0933333
23	NaN	2	2	2	0.800927	1.00899	-1.10667
5	NaN	2	2	2	-0.955919	-0.335832	0.443333
31	NaN	2	2	2	-3.475	-1.00407	-2.14333
25	NaN	2	2	2	-0.930879	-2.21376	-2.38667
9	NaN	2	2	2	-1.21532	-0.252576	NaN
16	NaN	2	2	2	-1.17946	-1.41344	-2.33333
10	NaN	2	2	2	-2.35685	0.156096	0.46
13	NaN	2	2	2	-1.63364	-0.379481	-2.56333
22	NaN	2	2	2	0.645961	-0.40394	1.27
26	NaN	2	2	2	-3.02568	-0.892423	-2.36667
35	NaN	2	2	2	-1.27234	-1.4971	-2.33333
27	NaN	2	2	2	0.170286	-0.328057	-2.77667
30	NaN	2	2	2	-0.376	-1.24139	-3
36	NaN	2	2	2	-0.149483	-0.321519	-1.315
