# Supplementary material for: Network-wide abnormalities explain memory variability in hippocampal amnesia
Source: eLife. 2019 Jul 8;8:e46156. doi: 10.7554/eLife.46156 (PMC6639076; doi:10.7554/eLife.46156)
Supplement: Figure 7—source data 1. — GM volume of the right HPC VBM cluster and the mean rsALFF in the PCC (z-res) and the visual forgetting scores (z) of healthy controls and patients that are plotted in Figure 7; GM: gray matter; HPC: hippocampus; MAP: Memory and Amnesia Project; OPTIMA: Oxford Project To Investigate Memory and Aging; PCC: posterior cingulate cortex; rsALFF: resting-state amplitude of low-frequency fluctuations; VBM: voxel-based morphometry; z: age-scaled and standardized scores for visual forgetting [Doors and People (Baddeley et al., 1994)]; z-res: GM volumes from VBM clusters are residualized against age, sex, scan source (MAP, OPTIMA), and TIV across participants; mean rsALFF is residualized against age and sex across participants. These data can be opened with Microsoft Excel or with open-source alternatives such as OpenOffice. [file elife-46156-fig7-data1.xlsx]

## Sheet: elife_paper_data_28_06_19_new
patient_code	control_code	neuropsych_controls_vs_patients	sMRI_controls_vs_patients	rsfMRI_controls_vs_patients	VBM_Right_HPC_zres	rsALFF_PCC_zres	visual_forgetting_z
NaN	30	0	1	0	0.739861	NaN	NaN
NaN	2	0	1	0	-0.158834	NaN	NaN
NaN	22	0	1	0	-0.0394087	NaN	NaN
NaN	10	0	1	0	-0.158408	NaN	NaN
NaN	16	0	1	0	0.275098	NaN	NaN
NaN	29	0	1	0	-0.0405448	NaN	NaN
NaN	24	0	1	0	-0.155573	NaN	NaN
NaN	28	0	1	0	0.428729	NaN	NaN
NaN	11	0	1	0	-0.485204	NaN	NaN
NaN	7	0	1	0	-0.22323	NaN	NaN
NaN	15	0	1	0	0.426058	NaN	NaN
NaN	3	0	1	0	-0.618138	NaN	NaN
NaN	14	0	1	0	-0.113849	NaN	NaN
NaN	31	0	1	0	0.236016	NaN	NaN
NaN	4	0	1	0	-0.243005	NaN	NaN
NaN	26	0	1	0	0.67857	NaN	NaN
NaN	5	0	1	0	-0.0417418	NaN	NaN
NaN	19	0	1	0	0.208951	NaN	NaN
NaN	18	0	1	0	0.281548	NaN	NaN
NaN	25	0	1	0	0.117295	NaN	NaN
NaN	6	0	1	0	-0.660625	NaN	NaN
NaN	9	0	1	0	0.197999	NaN	NaN
NaN	23	0	1	0	-0.294206	NaN	NaN
NaN	1	0	1	0	0.953536	NaN	NaN
NaN	8	0	1	0	0.092161	NaN	NaN
NaN	17	0	1	0	-0.519605	NaN	NaN
NaN	52	1	1	0	0.928438	NaN	-0.33
NaN	20	0	1	0	-0.702667	NaN	NaN
NaN	27	0	1	0	-0.269724	NaN	NaN
NaN	33	0	1	0	0.584643	NaN	NaN
NaN	21	0	1	0	0.225094	NaN	NaN
NaN	13	0	1	0	0.557902	NaN	NaN
NaN	32	0	1	0	-0.296037	NaN	NaN
NaN	37	0	1	0	0.928442	NaN	NaN
NaN	12	0	1	0	-0.398017	NaN	NaN
NaN	39	1	1	1	0.617934	1.70415	0.33
NaN	67	1	1	1	0.395344	2.26266	0.33
NaN	73	1	1	1	-0.0660604	1.27471	-0.33
NaN	66	1	1	1	0.531754	0.819618	0.33
NaN	45	1	1	1	1.89694	0.543115	0.33
NaN	35	0	1	1	1.19593	1.3746	NaN
NaN	55	1	1	1	1.53754	1.051	0.33
NaN	43	1	1	1	0.926831	1.36065	-0.33
NaN	64	1	1	1	0.888166	0.438084	0.33
NaN	41	1	1	1	2.00236	0.597149	0.33
NaN	71	1	1	1	0.749788	-0.605248	0.33
NaN	56	1	1	1	-0.203656	-0.151164	0.33
NaN	42	1	1	1	1.02209	1.55785	0.33
NaN	50	1	1	1	0.650854	-1.50694	0.33
NaN	51	1	1	1	0.686413	1.46283	0.33
NaN	72	1	1	1	0.725156	0.854537	0.33
NaN	63	1	1	1	0.046244	1.45955	0.33
NaN	75	1	1	1	0.827351	0.637691	0.33
NaN	54	1	1	1	0.401485	-0.427026	0.33
NaN	60	1	1	1	1.59275	-0.072136	0.33
NaN	47	1	1	1	1.91887	-0.172248	0.33
NaN	65	1	1	1	0.0639391	-0.536164	0.33
NaN	78	1	1	1	0.667385	0.593394	0.33
NaN	34	0	1	1	0.648221	-0.446586	NaN
NaN	49	1	1	1	0.946123	-0.725185	0.33
NaN	38	0	1	1	0.11004	0.142603	NaN
NaN	36	0	1	1	-0.432984	0.234327	NaN
NaN	57	1	1	1	0.580832	-0.496012	0.33
NaN	46	1	1	1	-0.125151	0.485118	0.33
NaN	74	1	1	1	1.54592	1.52716	0.33
NaN	62	1	1	1	-0.524875	-0.520128	0.33
NaN	70	1	1	1	0.616618	1.06068	0.33
1	NaN	2	2	0	-0.405263	NaN	0.33
34	NaN	2	2	0	-2.59905	NaN	NaN
32	NaN	2	2	0	-1.8427	NaN	-0.33
21	NaN	2	2	2	0.604847	-1.04591	0.33
20	NaN	2	2	2	-0.0807755	-0.803919	-2
19	NaN	2	2	2	1.1361	1.4758	0.33
33	NaN	2	2	2	-2.45008	-1.84378	-2
14	NaN	2	2	2	-1.56725	-1.18208	0
2	NaN	2	2	2	-0.230752	0.696771	-1.33
6	NaN	2	2	2	0.105594	-0.285356	0.33
8	NaN	2	2	2	0.147575	-0.839502	0.33
24	NaN	2	2	2	-1.73852	-0.572624	-2.67
18	NaN	2	2	2	0.798928	0.609298	0.33
4	NaN	2	2	2	-1.58764	-0.757332	NaN
29	NaN	2	2	2	-0.96669	0.0125872	-1.33
11	NaN	2	2	2	-0.867144	-0.468851	-0.33
28	NaN	2	2	2	-1.37723	-1.21082	0.33
17	NaN	2	2	2	-0.934808	-0.475104	0.33
12	NaN	2	2	2	-0.868234	1.11713	0.33
15	NaN	2	2	2	-0.776916	-0.786622	0.33
7	NaN	2	2	2	1.87485	1.01164	0.33
37	NaN	2	2	2	-1.02624	-0.917496	0.33
38	NaN	2	2	2	0.325734	-0.660043	0.33
3	NaN	2	2	2	1.27605	0.262077	0.33
23	NaN	2	2	2	0.713245	1.00899	0.33
5	NaN	2	2	2	-0.0976945	-0.335832	0.33
31	NaN	2	2	2	-2.62119	-1.00407	-2
25	NaN	2	2	2	-1.17264	-2.21376	-2
9	NaN	2	2	2	-0.233974	-0.252576	NaN
16	NaN	2	2	2	0.577455	-1.41344	0.33
10	NaN	2	2	2	-2.00699	0.156096	0.33
13	NaN	2	2	2	-1.94555	-0.379481	-3
22	NaN	2	2	2	-0.053948	-0.40394	-1.33
26	NaN	2	2	2	-2.26313	-0.892423	-0.33
35	NaN	2	2	2	-1.12172	-1.4971	-2.67
27	NaN	2	2	2	-0.224156	-0.328057	0.33
30	NaN	2	2	2	-0.710965	-1.24139	-2.67
36	NaN	2	2	2	-0.67082	-0.321519	NaN
