# Supplementary material for: Network-wide abnormalities explain memory variability in hippocampal amnesia
Source: eLife. 2019 Jul 8;8:e46156. doi: 10.7554/eLife.46156 (PMC6639076; doi:10.7554/eLife.46156)
Supplement: Figure 8—source data 1. [file elife-46156-fig8-data1.xlsx]

## Sheet: elife_paper_data_28_06_19_new
patient_code	control_code	neuropsych_controls_vs_patients	sMRI_controls_vs_patients	rsfMRI_controls_vs_patients	Left_thalamus_vol_zres	VBM_Left_HPC_zres	remote_autobiographical_memory
NaN	30	0	1	0	-0.0922701	0.589151	NaN
NaN	2	0	1	0	-0.19085	0.193507	NaN
NaN	22	0	1	0	-0.0601572	-0.582013	NaN
NaN	10	0	1	0	-0.422126	-0.272724	NaN
NaN	16	0	1	0	0.526369	0.0746407	NaN
NaN	29	0	1	0	0.96203	0.109593	NaN
NaN	24	0	1	0	-0.471466	-0.291398	NaN
NaN	28	0	1	0	0.311671	0.106718	NaN
NaN	11	0	1	0	-0.881111	-0.804656	NaN
NaN	7	0	1	0	0.937527	-0.139765	NaN
NaN	15	0	1	0	0.503575	0.417335	NaN
NaN	3	0	1	0	-0.731768	-0.564556	NaN
NaN	14	0	1	0	1.34665	0.0833658	NaN
NaN	31	0	1	0	1.76726	-0.0371181	NaN
NaN	4	0	1	0	1.11125	0.202272	NaN
NaN	26	0	1	0	2.12548	-0.232714	NaN
NaN	5	0	1	0	-1.35477	0.581953	NaN
NaN	19	0	1	0	0.827146	0.0214326	NaN
NaN	18	0	1	0	-0.0918834	-0.478001	NaN
NaN	25	0	1	0	0.656287	-0.761643	NaN
NaN	6	0	1	0	-1.74725	-0.558748	NaN
NaN	9	0	1	0	-1.11155	0.448855	NaN
NaN	23	0	1	0	-0.467447	-0.150434	NaN
NaN	1	0	1	0	-0.829697	0.554588	NaN
NaN	8	0	1	0	-0.112492	0.392132	NaN
NaN	17	0	1	0	-1.3205	-0.165247	NaN
NaN	52	1	1	0	-1.22884	0.565234	NaN
NaN	20	0	1	0	-0.429423	-0.231213	NaN
NaN	27	0	1	0	-0.746532	0.0125106	NaN
NaN	33	0	1	0	1.31785	0.0721267	NaN
NaN	21	0	1	0	0.314368	0.121239	NaN
NaN	13	0	1	0	0.277826	0.584252	NaN
NaN	32	0	1	0	-0.512167	0.518393	NaN
NaN	37	0	1	0	-0.0773517	1.04053	NaN
NaN	12	0	1	0	-0.093989	0.258293	NaN
NaN	39	1	1	1	0.205517	0.403339	17
NaN	67	1	1	1	-1.16151	0.0992283	NaN
NaN	73	1	1	1	0.354662	0.0610973	NaN
NaN	66	1	1	1	0.984714	0.572102	8
NaN	45	1	1	1	0.770459	1.87671	18
NaN	35	0	1	1	1.12621	1.4023	NaN
NaN	55	1	1	1	-0.24236	0.907488	12
NaN	43	1	1	1	1.56318	1.6142	12
NaN	64	1	1	1	-0.579366	0.3737	15
NaN	41	1	1	1	-0.0985122	1.97381	18
NaN	71	1	1	1	0.59868	0.542676	18
NaN	56	1	1	1	0.702027	0.543587	17
NaN	42	1	1	1	1.56634	1.36176	18
NaN	50	1	1	1	1.53909	0.345402	17
NaN	51	1	1	1	0.452657	0.895819	17
NaN	72	1	1	1	-0.56199	0.518712	12
NaN	63	1	1	1	-0.848293	0.0340454	NaN
NaN	75	1	1	1	2.05629	1.13502	NaN
NaN	54	1	1	1	0.246191	-0.140408	13
NaN	60	1	1	1	0.995944	1.13056	13
NaN	47	1	1	1	0.885411	1.47207	18
NaN	65	1	1	1	1.41707	0.224959	18
NaN	78	1	1	1	-0.708889	0.741195	18
NaN	34	0	1	1	1.64566	1.00177	NaN
NaN	49	1	1	1	2.19808	0.763408	18
NaN	38	0	1	1	0.350913	-0.335143	NaN
NaN	36	0	1	1	-0.26913	-0.423668	NaN
NaN	57	1	1	1	-0.0151607	0.137305	NaN
NaN	46	1	1	1	-0.322707	0.486359	NaN
NaN	74	1	1	1	0.465987	1.03747	18
NaN	62	1	1	1	-0.0394023	-0.645283	18
NaN	70	1	1	1	-0.0144589	0.545014	NaN
1	NaN	2	2	0	-1.77107	-0.711501	8
34	NaN	2	2	0	-1.21241	-2.93237	2
32	NaN	2	2	0	-0.16396	-1.80245	14
21	NaN	2	2	2	-0.229075	-0.853442	6
20	NaN	2	2	2	-0.935524	-0.360821	4
19	NaN	2	2	2	1.41771	1.44519	11.5
33	NaN	2	2	2	-1.87687	0.281831	7
14	NaN	2	2	2	-1.02852	-0.777999	8
2	NaN	2	2	2	-2.09573	-0.152816	NaN
6	NaN	2	2	2	-0.058102	0.406071	15
8	NaN	2	2	2	0.784203	0.757818	8
24	NaN	2	2	2	-0.931759	-1.56004	10
18	NaN	2	2	2	0.0782424	0.734292	16
4	NaN	2	2	2	-0.779192	-1.52937	5
29	NaN	2	2	2	0.753994	-0.779694	6.5
11	NaN	2	2	2	-0.943091	0.120517	NaN
28	NaN	2	2	2	0.322836	-0.608239	NaN
17	NaN	2	2	2	-2.02407	-1.43458	7
12	NaN	2	2	2	1.02978	0.917947	16
15	NaN	2	2	2	-0.707278	0.490711	6
7	NaN	2	2	2	0.437245	1.13464	11
37	NaN	2	2	2	-2.03096	-1.30015	2
38	NaN	2	2	2	1.25087	0.981278	NaN
3	NaN	2	2	2	0.649289	0.152106	11
23	NaN	2	2	2	0.498555	0.800927	18
5	NaN	2	2	2	-0.310031	-0.955919	15
31	NaN	2	2	2	-0.657449	-3.475	5
25	NaN	2	2	2	0.184087	-0.930879	14
9	NaN	2	2	2	-0.0743348	-1.21532	18
16	NaN	2	2	2	-0.835992	-1.17946	8
10	NaN	2	2	2	-1.00482	-2.35685	11
13	NaN	2	2	2	-1.48015	-1.63364	NaN
22	NaN	2	2	2	0.7944	0.645961	18
26	NaN	2	2	2	-0.152459	-3.02568	3
35	NaN	2	2	2	-0.113264	-1.27234	11
27	NaN	2	2	2	-0.366454	0.170286	8
30	NaN	2	2	2	-1.51936	-0.376	NaN
36	NaN	2	2	2	-0.174247	-0.149483	NaN
